# Supplementary material
Source: publisher figshare collection journal article supplement (https://acs.figshare.com/ndownloader/files/20098814)
Supplement: Supplementary file 1 [file 20098814]

## Supporting Information

### **Robust Self-Healing Magnetically Induced Colloidal Photonic Crystals Hydrogels**

*Su-Na Yin, <sup>\*a</sup> Juan Liu, <sup>a</sup> Defeng Wu, <sup>a</sup> Su Chen <sup>\*b</sup> and Weiwei Xia <sup>c</sup>*

School of Chemistry and Chemical Engineering, Yangzhou University, 180  
Siwangting Road, Yangzhou, Jiangsu 225002, P. R. China

#### **Corresponding Author**

\*E-mail: [snyin@yzu.edu.cn](mailto:snyin@yzu.edu.cn)

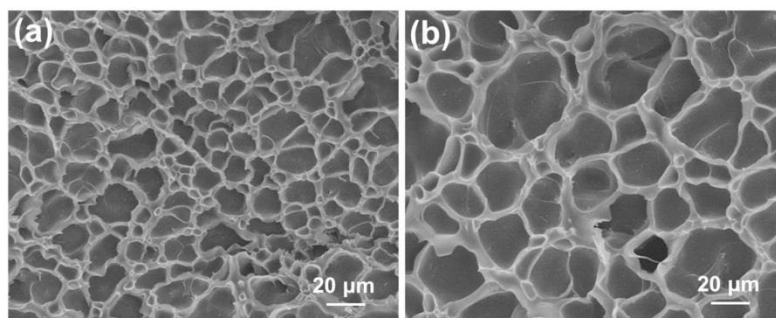

**Figure S1.** SEM images of O-CMC-modified poly (NVP-co-AAM) hydrogel with microporous structure at different [NVP]/[AAM] ratios of (a) 1:3 and (b) 1:1 (mol/mol).

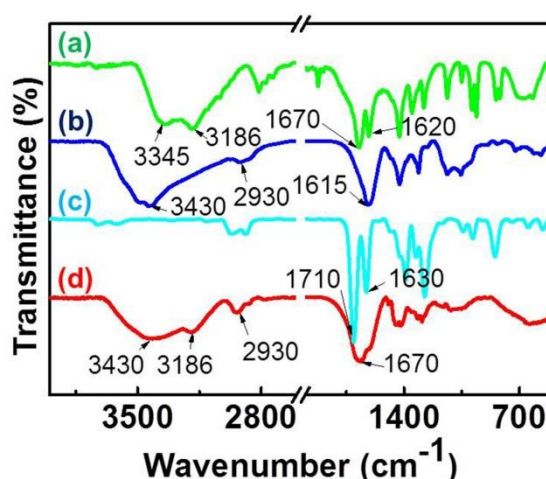

**Figure S2.** FT-IR spectra of (a) acrylamide (AAM), (b) O-carboxymethyl chitosan (O-CMC), (c) 1-vinyl-2-pyrrolidinone (NVP) and (d) self-healing hydrogel.

In order to fabricate self-healing functional colored hydrogels, we immobilized CPCs structures into O-CMC-modified poly (NVP-co-AAM) polymer. Figure S2a-d showed the FT-IR spectra of pure AAM, pure O-CMC, pure NVP and as-prepared CPCs-loaded hydrogels, respectively. The FT-IR spectrum of pure AAM presented characteristic absorption peaks at 3345 and 3186 cm<sup>-1</sup> associated with the asymmetric and symmetric stretching vibration of -NH<sub>2</sub> group, at 1670 cm<sup>-1</sup> related to the stretching vibration of C=O group, and at 1620 cm<sup>-1</sup> corresponding to the bending

vibration of N-H group or C=C absorption in AAM units (Figure S2a). The monomer O-CMC showed characteristic absorption peaks at  $3430\text{ cm}^{-1}$  reflecting the stretching vibration of  $-\text{NH}_2$  and  $-\text{OH}$  groups, at  $2930\text{ cm}^{-1}$  assigned to  $-\text{C}-\text{H}$  stretch vibration, and at  $1615\text{ cm}^{-1}$  corresponding to N-H group and  $-\text{COOH}$  group vibration (Figure S2b). The monomer NVP appeared characteristic absorption peaks at  $1710\text{ cm}^{-1}$  ascribed to cyclic amide stretching of C=O group, and at  $1630\text{ cm}^{-1}$  corresponding to the C=C group on the NVP structure (Figure S2c). By comparing Figure S2d with Figure S2a, b, and c, the existence of characteristic absorption peaks at 3430, 3186, 2930 and  $1670\text{ cm}^{-1}$  proved the formation of the expected polymer hydrogels. The disappearing of the absorption band at  $1630\text{ cm}^{-1}$  further indicated that polymer hydrogels were prepared by breaking the C=C bond from the monomers successfully.

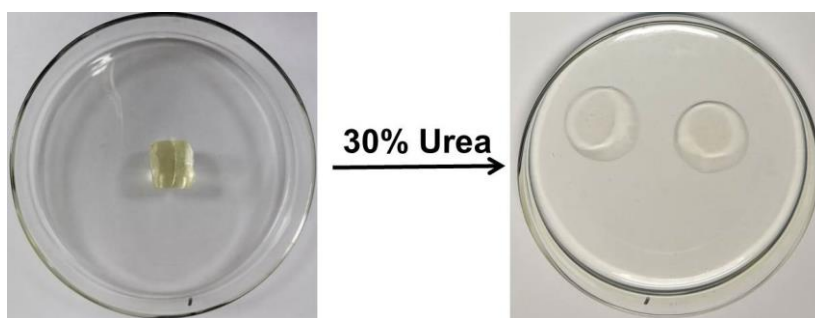

**Figure S3.** Self-healing hydrogels separated upon exposure to an aqueous solution of 30% urea.

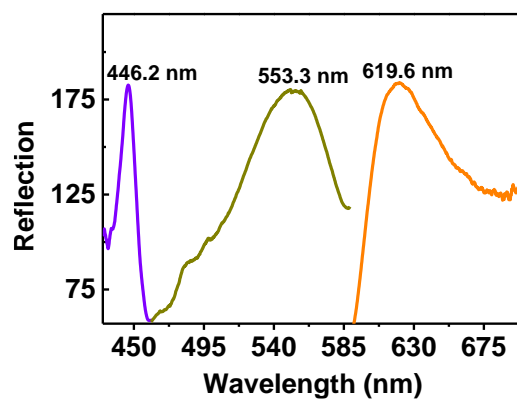

**Figure S4.** Reflectance spectra of self-healing Colloidal Photonic Crystals (CPCs) hydrogels containing  $\text{Fe}_3\text{O}_4@\text{SiO}_2$  CNs with different average sizes of 130 nm, 180 nm and 200 nm.

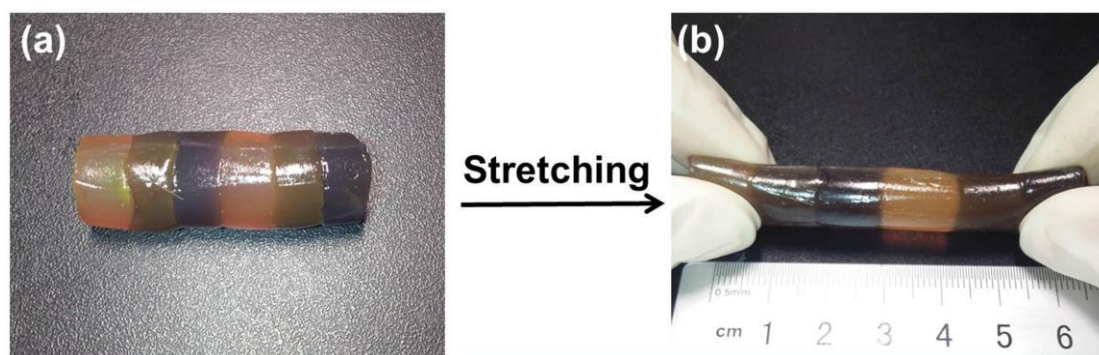

**Figure S5.** The tensile property of the self-healing CPCs hydrogel after 20 months.

**Movie S1.** Structural color of the magnetic CPCs changes remarkably with the distance of external magnetic field.

**Movie S2.** Stretching property of the structural colored CPCs hydrogel.
